# Supplementary material
Source: publisher figshare collection journal article supplement (https://tandf.figshare.com/articles/dataset/_/6960512)
Supplement: Supplementary file 1 [file 1]

## Supplementary Material 4: phylogenetic analysis

### Contents

1. Disparity metrics of main Paucituberculata clades.
2. Heatmaps GED of each time-bin, performed using the command “heatmap.2” of the R package *gplots* (Warnes et al. 2016).
3. Interquartile intervals by jack-knifing.
4. Scree-plots of PCOs.
5. Shapiro-Wilk normality tests, performed using the command “shapiro.test” of the R core package *stats*.
6. Jack-knife script used in this study
7. Comparison of Weighted Mean Pairwise Distance (WMPD; distances weighted by the ratio of comparable characters) based on different distance measurements.

### 1. Disparity metrics of main Paucituberculata clades

| Clade         | WMPD     | SV       | SM       |
|---------------|----------|----------|----------|
| Caenolestidae | 3.488108 | 6.597165 | 21.18668 |
| Pichipilidae  | 3.832916 | 8.387727 | 19.36744 |
| NPP           | 3.834038 | 14.03157 | 43.3636  |

2.1. Heatmap of GED for Eocene

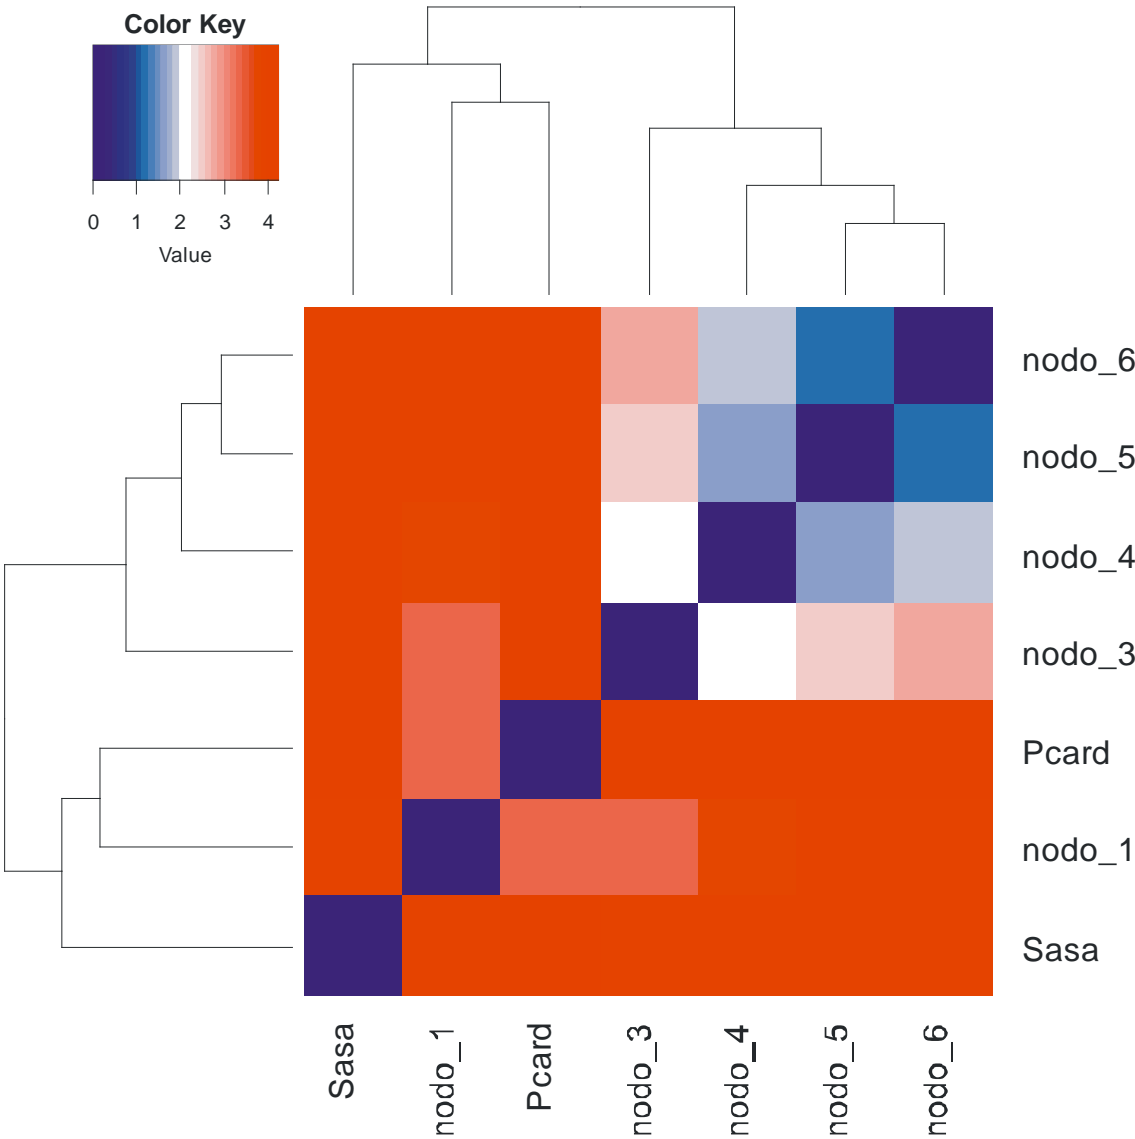

2.2. Heatmap of GED for early Oligocene

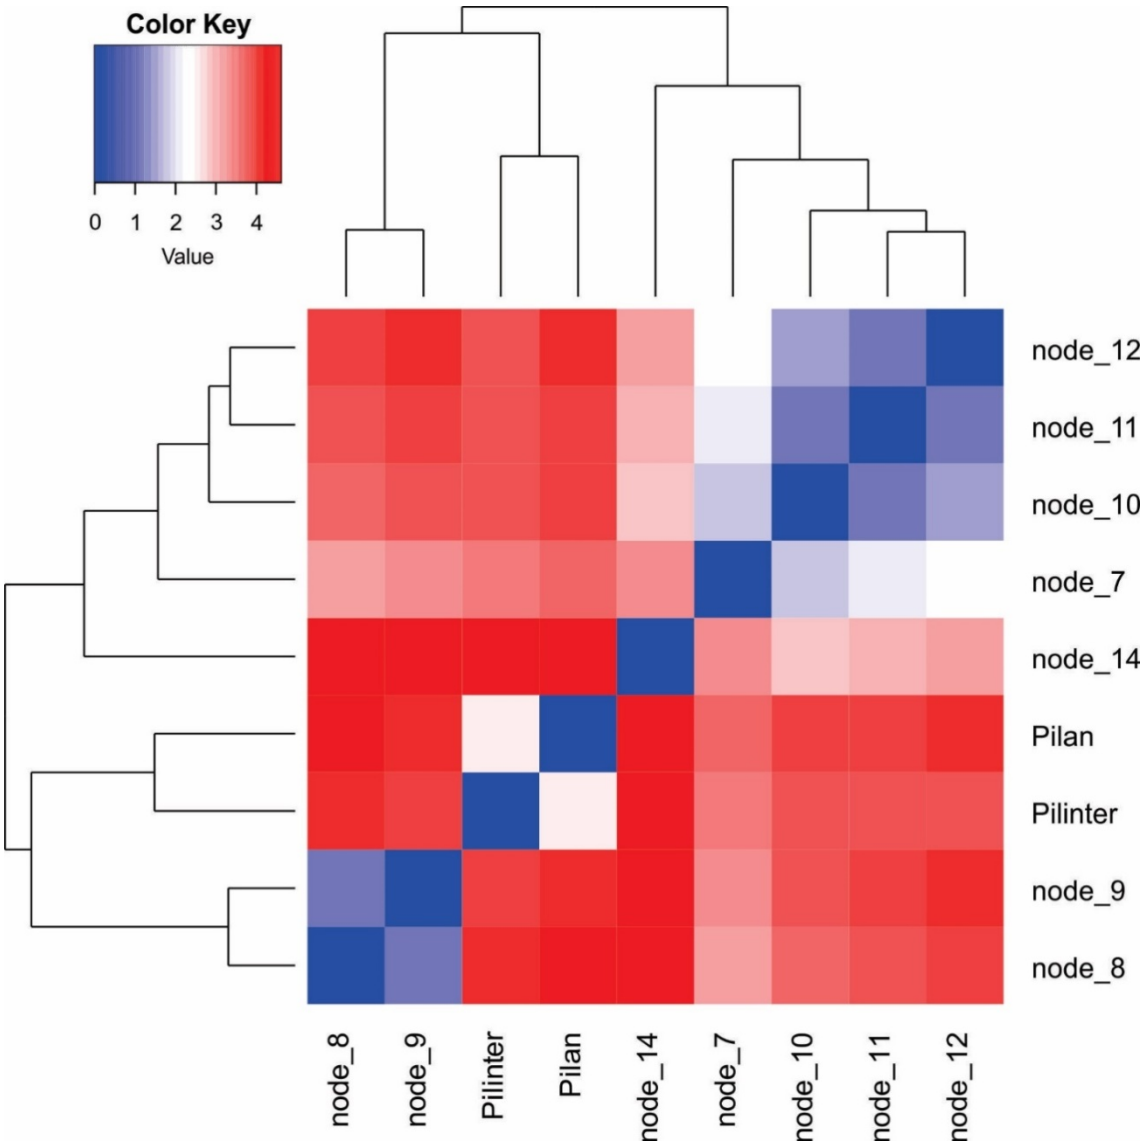

2.3. Heatmap of GED for late Oligocene

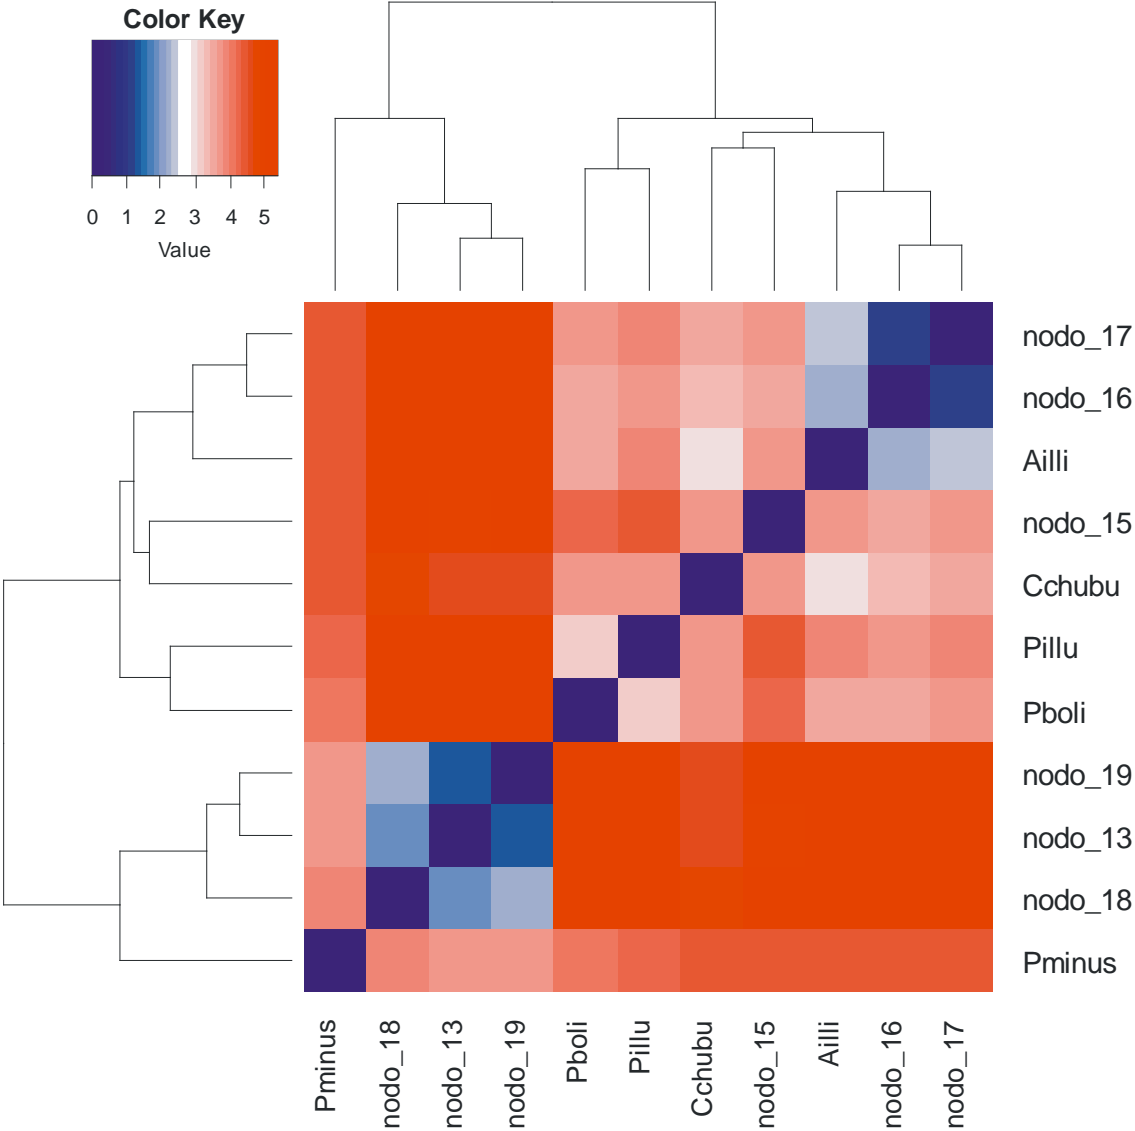

2.4. Heatmap of GED for Miocene

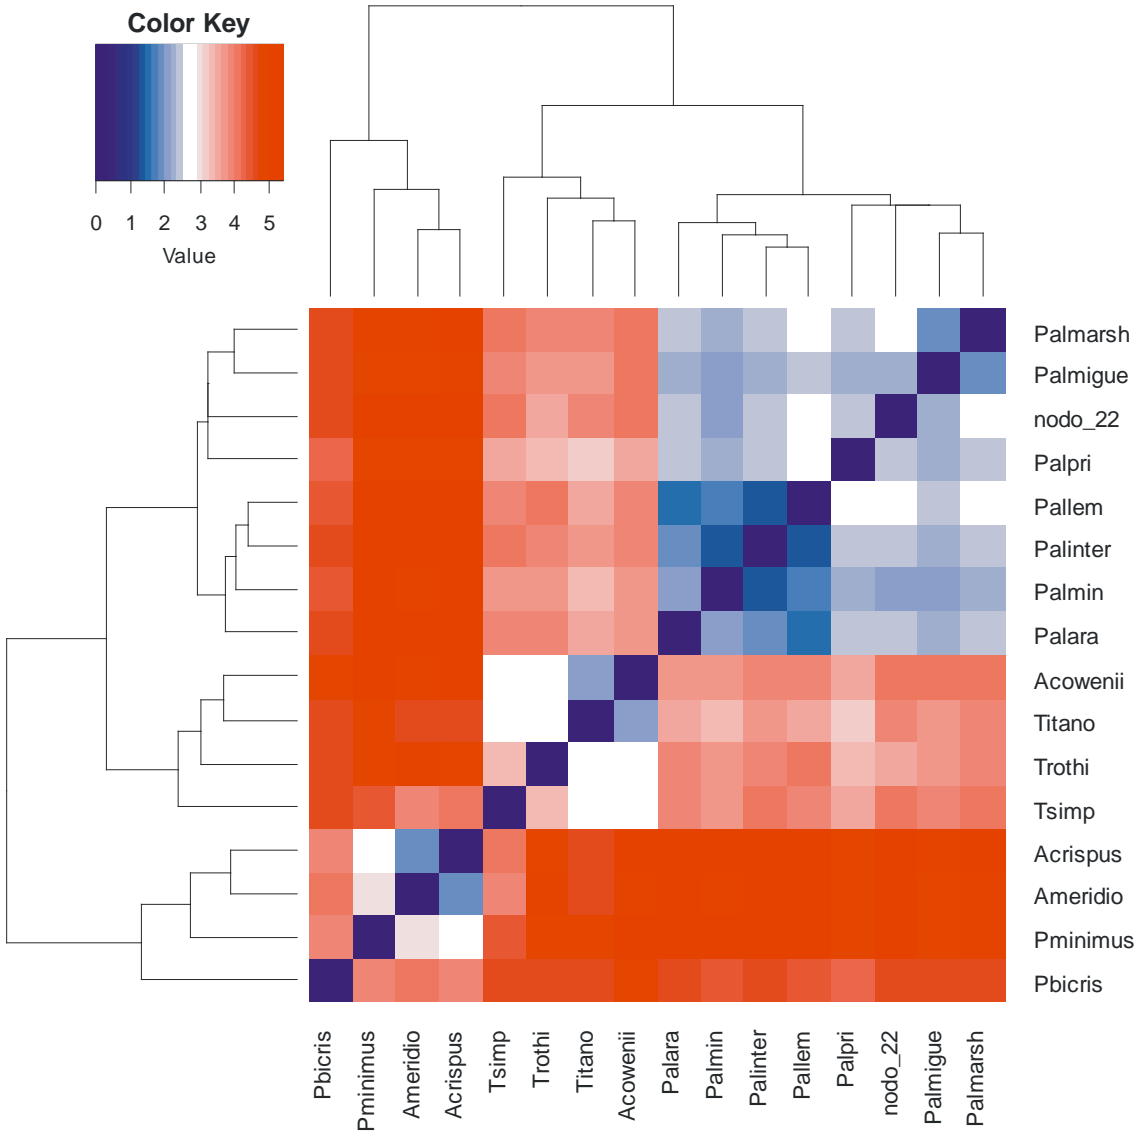

### 3. Quantile intervals built by jack-knifing on taxa-character matrices.

| <b>WMPD</b>     | <b>0%</b> | <b>25%</b> | <b>50%</b> | <b>75%</b> | <b>100%</b> |
|-----------------|-----------|------------|------------|------------|-------------|
| Eocene          | 2.585720  | 2.902587   | 3.299078   | 3.423777   | 3.504061    |
| early Oligocene | 3.119762  | 3.195397   | 3.223932   | 3.489785   | 3.515387    |
| late Oligocene  | 4.005940  | 4.075391   | 4.118288   | 4.192077   | 4.254889    |
| Miocene         | 3.542464  | 3.662801   | 3.762037   | 3.816493   | 3.848884    |
| <b>SV</b>       | <b>0%</b> | <b>25%</b> | <b>50%</b> | <b>75%</b> | <b>100%</b> |
| Eocene          | 4.400295  | 5.132765   | 6.766983   | 7.112032   | 7.462206    |
| early Oligocene | 5.436537  | 5.612010   | 5.713701   | 6.464700   | 6.656255    |
| late Oligocene  | 7.557030  | 7.881399   | 8.206596   | 8.363652   | 8.558585    |
| Miocene         | 5.915557  | 6.355618   | 6.611127   | 6.667844   | 6.826756    |
| <b>SR</b>       | <b>0%</b> | <b>25%</b> | <b>50%</b> | <b>75%</b> | <b>100%</b> |
| Eocene          | 11.57460  | 11.69859   | 14.19544   | 14.70237   | 15.07016    |
| early Oligocene | 13.22908  | 14.27064   | 14.83464   | 15.37817   | 15.79938    |
| late Oligocene  | 16.56091  | 16.89876   | 18.02053   | 18.33581   | 18.58594    |
| Miocene         | 14.94396  | 16.39779   | 16.58472   | 16.69301   | 16.97159    |

**4. Cumulative variance scree-plots of PCOs. Eigenvectors analyzed for disparity are highlighted in red.**

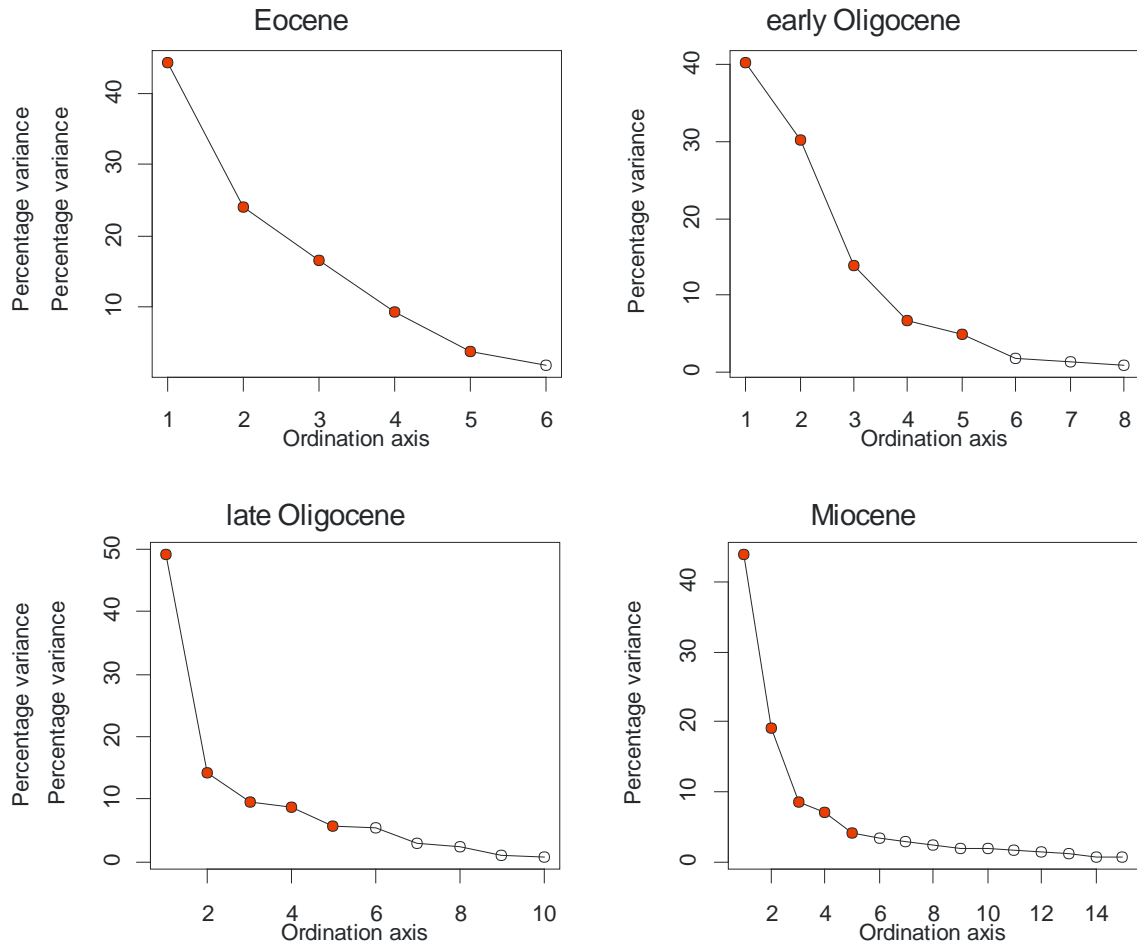

**5.1 Shapiro-Wilk normality test of GEDs.**

|                 | W      | p-value |
|-----------------|--------|---------|
| Eocene          | 0.8020 | 0.0007  |
| early Oligocene | 0.8656 | 0.0004  |
| late Oligocene  | 0.9079 | 0.0004  |
| Miocene         | 0.9400 | 0.0000  |

**5.2 Shapiro-Wilk normality test of PCO scores.**

|                 | W      | p-value |
|-----------------|--------|---------|
| Eocene          | 0.9865 | 0.9683  |
| early Oligocene | 0.9200 | 0.0126  |
| late Oligocene  | 0.9012 | 0.0057  |
| Miocene         | 0.9359 | 0.0114  |

## 6. Jack-knife script used in this study.

```
Time.bins=as.numeric(readline(print("number of time-bins:")))

weighted.mean=list(NULL)

sum.var=list(NULL)

sum.range=list(NULL)

for (j in 1: Time.bins)

{

nexus.obs <- ReadMorphNexus(file = file.choose())

dist.obs<- MorphDistMatrix(nexus.obs)

obs.comparable.char <- as.dist(dist.obs$comp.char.matrix)

ged.obs<-dist.obs$GED.dist.matrix

tr.obs<-as.dist(ged.obs)

pco.obs <- cmdscale(d = dist.obs$GED.dist.matrix,k = nrow(dist.obs$GED.dist.matrix)-1,
add = TRUE)$points

weighted.mean.obs<-(sum(obs.comparable.char*tr.obs)/sum(obs.comparable.char))

sum.var.obs<-sum(apply(pco.obs[,1:5], 2, var))

sum.range.obs<-sum(apply(apply(pco.obs[,1:5], 2, range), 2, diff))

nexJACK=nexus.obs

taxa=nrow(nexJACK$matrix)

w.mean.jack<-numeric(0)

sum.var.jack<-numeric(0)

sum.range.jack=numeric(0)

for (i in 1:taxa)

{

jack.m=nexJACK

jack.m$matrix=jack.m$matrix[-i,]

dist.jack <- MorphDistMatrix(jack.m)

Jack.comparable.char <- as.dist(dist.jack $comp.char.matrix)

ged.jack<-dist.jack$GED.dist.matrix

tr.jack<-as.dist(ged.jack)

pco.jack <- cmdscale(d = dist.jack$GED.dist.matrix,k =
nrow(dist.jack$GED.dist.matrix)-1, add = TRUE)$points

w.mean.jack<-
c(w.mean.jack,(sum(Jack.comparable.char*tr.jack)/sum(Jack.comparable.char)))

sum.var.jack<-c(sum.var.jack,sum(apply(pco.jack[,1:5], 2, var)))

sum.range.jack<-c(sum.range.jack,sum(apply(apply(pco.jack[,1:5], 2, range), 2, diff)))

}

weighted.mean[[j]]=list(weighted.mean.obs,w.mean.jack)

sum.var[[j]]=list(sum.var.obs,sum.var.jack)

sum.range[[j]]=list(sum.range.obs,sum.range.jack)

}
```



**7. Comparison of Weighted Mean Pairwise Distance (WMPD; distances weighted by the ratio of comparable characters) based on different distance measurements.** WMPD based on GED showed the highest resemblance respect the one based on raw distances (RED), followed by WMPD based on Gower transformation, while that based on MORD showed highest departure, therefore we avoided to use this type of distance.

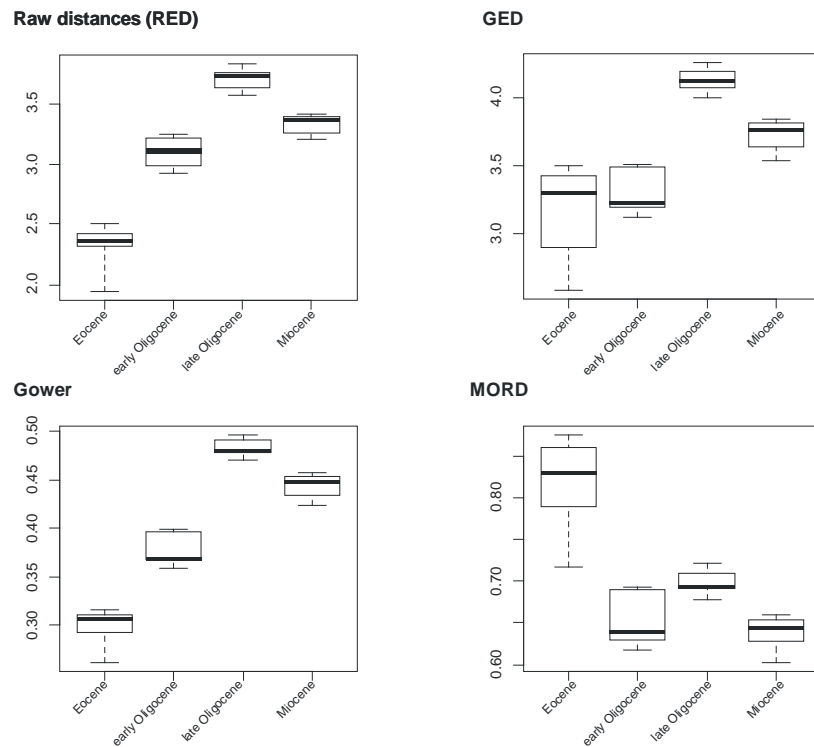

## References

Warnes, GR, Bolker B, Bonebakker L, Gentleman R, Huber W, Liaw A, Lumley T, Maechler M, Magnusson A, Moeller S, Schwartz M & Venables B (2016). gplots: Various R Programming Tools for Plotting Data. R package version 3.0.1. <https://CRAN.R-project.org/package=gplots>
